# Supplementary material
Source: PubMed Central journal article supplement (PMC6727976)
Supplement: NIHMS1531188-supplement-2.pdf [file NIHMS1531188-supplement-2.pdf]

Table S1. Patient information

| Sample ID | Source                                 | Tissue type              | Tumor differentiation status | Stage | Sex    | Age | Race  |
|-----------|----------------------------------------|--------------------------|------------------------------|-------|--------|-----|-------|
| hT97      | Johns Hopkins University               | Pancreas Tumor           | Moderately differentiated    | IB    | Female | 81  | Other |
| hT99      | Memorial Sloan Kettering Cancer Center | Pancreas Tumor           | Poorly differentiated        | IV    | Male   | 65  | White |
| hT103     | Johns Hopkins University               | Pancreas Tumor           | Poorly differentiated        | IIB   | Male   | 87  | White |
| hT137     | Johns Hopkins University               | Pancreas Tumor           | Poorly differentiated        | IIA   | Male   | 74  | White |
| hT149     | Johns Hopkins University               | Pancreas Tumor           | Moderately differentiated    | IB    | Female | 71  | White |
| hN149     | Johns Hopkins University               | Pancreas Adjacent Normal | N/A                          | N/A   |        |     |       |
| hT150     | Johns Hopkins University               | Pancreas Tumor           | Moderately differentiated    | IIB   |        |     |       |
| hN150     | Johns Hopkins University               | Pancreas Adjacent Normal | N/A                          | N/A   | Male   | 64  | White |

Table S2. Cell numbers analyzed from each human sample

| hT97 | hT99 | hT103 | hT137 | hN149 | hT149 | hN150 | hT150 | Total |
|------|------|-------|-------|-------|-------|-------|-------|-------|
| 2862 | 5797 | 1354  | 1578  | 953   | 2190  | 4657  | 1809  | 21200 |

Table S3. Statistics of the clustering analysis of the human single cell RNA sequencing (scRNAseq)

| Cluster      | Cells        | Normal      | Tumor        | P-Value    | FDR        |
|--------------|--------------|-------------|--------------|------------|------------|
| 1            | 2356         | 1169        | 1187         | 1.68E-179  | 2.51E-178  |
| 2            | 1032         | 130         | 902          | 2.05E-18   | 3.08E-17   |
| 3            | 8952         | 2251        | 6701         | 0.07775508 | 1          |
| 4            | 6940         | 1715        | 5225         | 0.4786068  | 1          |
| 5            | 204          | 64          | 140          | 0.02387092 | 0.3580638  |
| 6            | 231          | 15          | 216          | 4.27E-10   | 6.40E-09   |
| 7            | 371          | 13          | 358          | 1.52E-20   | 2.28E-19   |
| 8            | 325          | 61          | 264          | 0.02287718 | 0.34315774 |
| 9            | 392          | 141         | 251          | 1.12E-07   | 1.67E-06   |
| 10           | 133          | 11          | 122          | 2.47E-05   | 0.00037077 |
| 11           | 32           | 3           | 29           | 0.07728217 | 1          |
| 12           | 81           | 16          | 65           | 0.40515295 | 1          |
| 13           | 56           | 7           | 49           | 0.05627189 | 0.84407829 |
| 14           | 37           | 4           | 33           | 0.08432909 | 1          |
| 15           | 58           | 10          | 48           | 0.26841135 | 1          |
| <b>Total</b> | <b>21200</b> | <b>5610</b> | <b>15590</b> |            |            |

Table S5. Statistics of the human ductal cell analysis

| Cluster      | Cells       | Normal     | Tumor       | P-Value    | FDR        |
|--------------|-------------|------------|-------------|------------|------------|
| 1            | 936         | 37         | 899         | 1.28E-47   | 5.13E-47   |
| 2            | 90          | 90         | 0           | 6.58E-62   | 2.63E-61   |
| 3            | 323         | 62         | 261         | 0.03664159 | 0.14656636 |
| 4            | 53          | 10         | 43          | 0.44236014 | 1          |
| <b>Total</b> | <b>1402</b> | <b>199</b> | <b>1203</b> |            |            |

Table S7. Statistics of the human myeloid cell analysis

| Cluster      | Cells       | Normal      | Tumor       | P-Value    | FDR        |
|--------------|-------------|-------------|-------------|------------|------------|
| 1            | 3362        | 617         | 2745        | 7.03E-16   | 4.22E-15   |
| 2            | 3649        | 1482        | 2167        | 5.95E-116  | 3.57E-115  |
| 3            | 76          | 11          | 65          | 0.06139931 | 0.36839586 |
| 4            | 593         | 0           | 593         | 4.20E-43   | 2.52E-42   |
| 5            | 69          | 28          | 41          | 0.00267075 | 0.0160245  |
| 6            | 126         | 0           | 126         | 3.78E-10   | 2.27E-09   |
| <b>Total</b> | <b>7875</b> | <b>2138</b> | <b>5737</b> |            |            |

Table S9. Statistics of the human T & NK cell analysis

| Cluster      | Cells       | Normal      | Tumor       | P-Value    | FDR       |
|--------------|-------------|-------------|-------------|------------|-----------|
| 1            | 3137        | 1532        | 1605        | 5.12E-224  | 2.56E-223 |
| 2            | 2260        | 3           | 2257        | 4.01E-158  | 2.00E-157 |
| 3            | 658         | 10          | 648         | 4.27E-42   | 2.14E-41  |
| 4            | 293         | 78          | 215         | 0.39979229 | 1         |
| 5            | 44          | 8           | 36          | 0.43764159 | 1         |
| <b>Total</b> | <b>6392</b> | <b>1631</b> | <b>4761</b> |            |           |

Table S11. Cell numbers analyzed for fibroblast subtypes from each human sample

| Cluster      | hT97      | hT99      | hT103      | hT137     | hT137 FE   | hN149    | hT149     | hN150    | hT150     |
|--------------|-----------|-----------|------------|-----------|------------|----------|-----------|----------|-----------|
| iCAF         | 15        | 27        | 123        | NA        | 19         | 1        | NA        | 1        | 5         |
| myCAF        | 23        | 62        | 3          | 23        | 592        | 2        | 26        | 5        | 35        |
| <b>Total</b> | <b>38</b> | <b>89</b> | <b>126</b> | <b>23</b> | <b>611</b> | <b>3</b> | <b>26</b> | <b>6</b> | <b>40</b> |

Table S12. Statistics of the human fibroblast analysis

| Cluster      | Cells | Normal     | Tumor    | P-Value    | FDR      |          |
|--------------|-------|------------|----------|------------|----------|----------|
| iCAF         |       | 191        | 2        | 189        | 1.20E-13 | 2.39E-13 |
| myCAF        |       | 781        | 7        | 774        | 2.40E-52 | 4.80E-52 |
| <b>Total</b> |       | <b>972</b> | <b>9</b> | <b>963</b> |          |          |

Table S17. Statistics of all viable KPC mouse cell analysis

| Cluster      | Sample 1    | Sample 2    | Sample 3    | Sample 4    | Total        |
|--------------|-------------|-------------|-------------|-------------|--------------|
| 1            | 2047        | 970         | 2864        | 2141        | <b>8022</b>  |
| 2            | 200         | 6           | 54          | 54          | <b>314</b>   |
| 3            | 106         | 21          | 23          | 14          | <b>164</b>   |
| 4            | 224         | 969         | 44          | 60          | <b>1297</b>  |
| 5            | 57          | 4           | 59          | 109         | <b>229</b>   |
| 6            | 93          | 53          | 42          | 10          | <b>198</b>   |
| 7            | 127         | 58          | 243         | 110         | <b>538</b>   |
| 8            | 17          | 10          | 15          | 19          | <b>61</b>    |
| 9            | 68          | 45          | 50          | 23          | <b>186</b>   |
| 10           | 16          | 8           | 21          | 3           | <b>48</b>    |
| 11           | 10          | 3           | 3           | 16          | <b>32</b>    |
| 12           | 0           | 0           | 0           | 171         | <b>171</b>   |
| <b>Total</b> | <b>2965</b> | <b>2147</b> | <b>3418</b> | <b>2730</b> | <b>11260</b> |

Table S19. Statistics of the KPC mouse fibroblast-enriched fraction analysis

| Cluster      | Cells       |
|--------------|-------------|
| 1            | 171         |
| 2            | 83          |
| 3            | 2311        |
| 4            | 1170        |
| 5            | 983         |
| 6            | 3165        |
| 7            | 23          |
| 8            | 479         |
| 9            | 31          |
| 10           | 27          |
| <b>Total</b> | <b>8443</b> |

Table S21. Statistics of the fibroblasts from KPC mouse fibroblast-enriched population

| Cluster      | Cells       |
|--------------|-------------|
| iCAF         | 1373        |
| apCAF        | 964         |
| myCAF        | 1675        |
| <b>Total</b> | <b>4012</b> |
